# Supplementary material for: Evaluation of Selenomethionine Entrapped in Nanoparticles for Oral Supplementation Using In Vitro, Ex Vivo and In Vivo Models
Source: MDPI journal article supplement (doi:10.3390/molecules28072941), 2023-03-25
Supplement: s1 [file s1]

# Supplementary

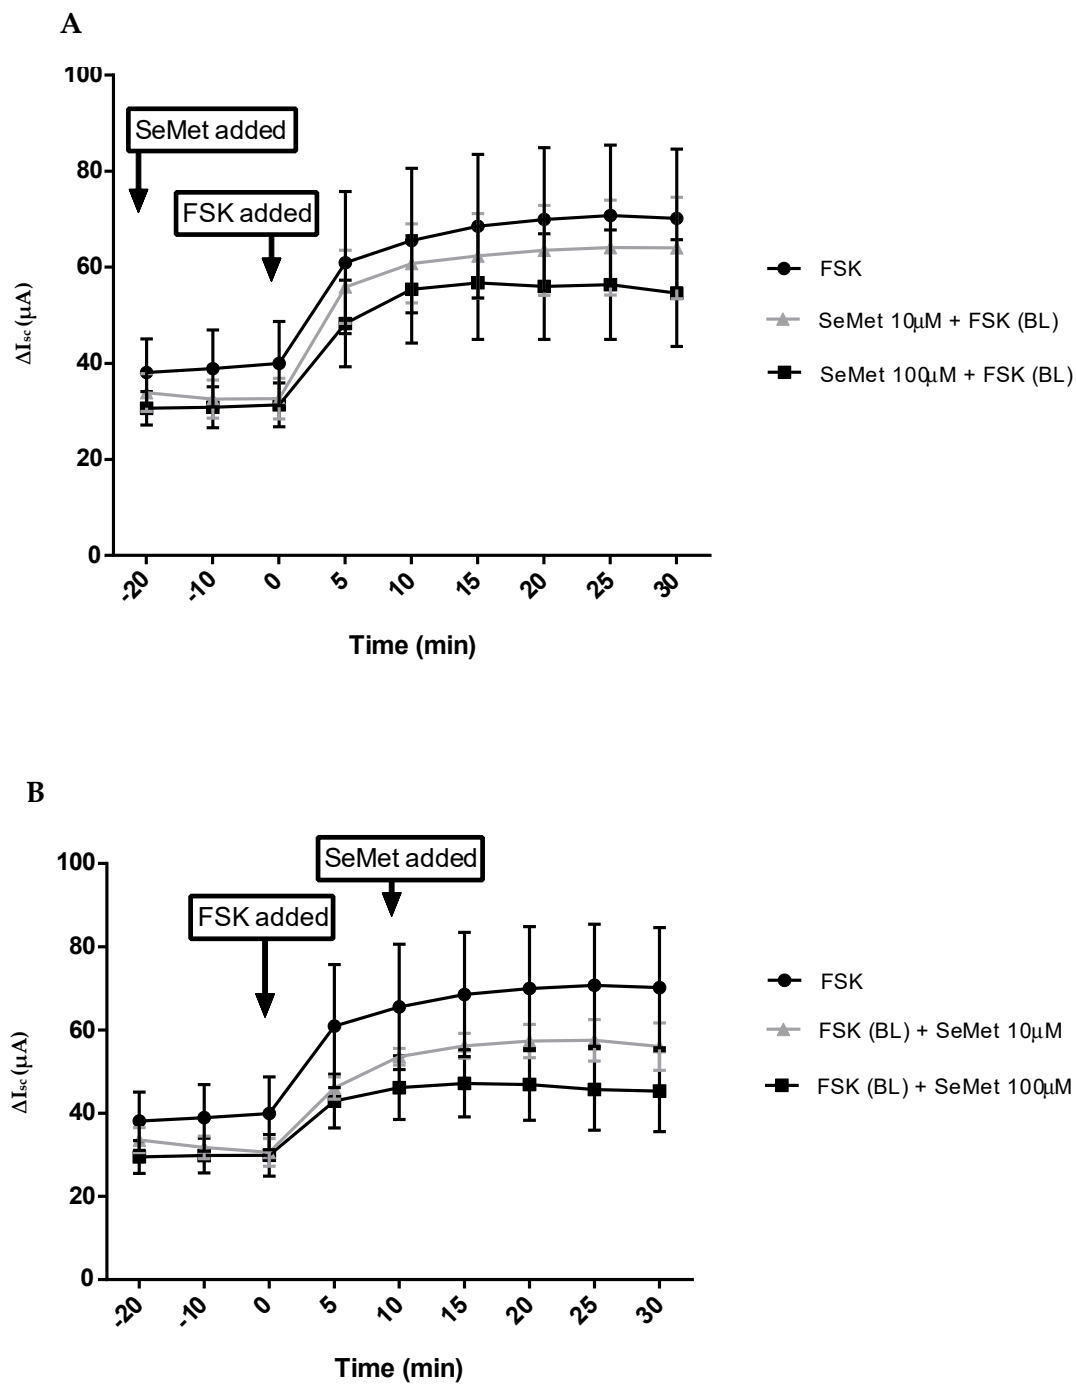

**Figure S1.** The effect of SeMet at 10 $\mu M$  and 100 $\mu M$  (AP&BL) on FSK-mediated  $Cl^-$  secretion in rat jejunum mucosae. A) SeMet pre-incubated before FSK addition in jejunal mucosae; B) SeMet addition on plateau of FSK induced peak in jejunal mucosae.

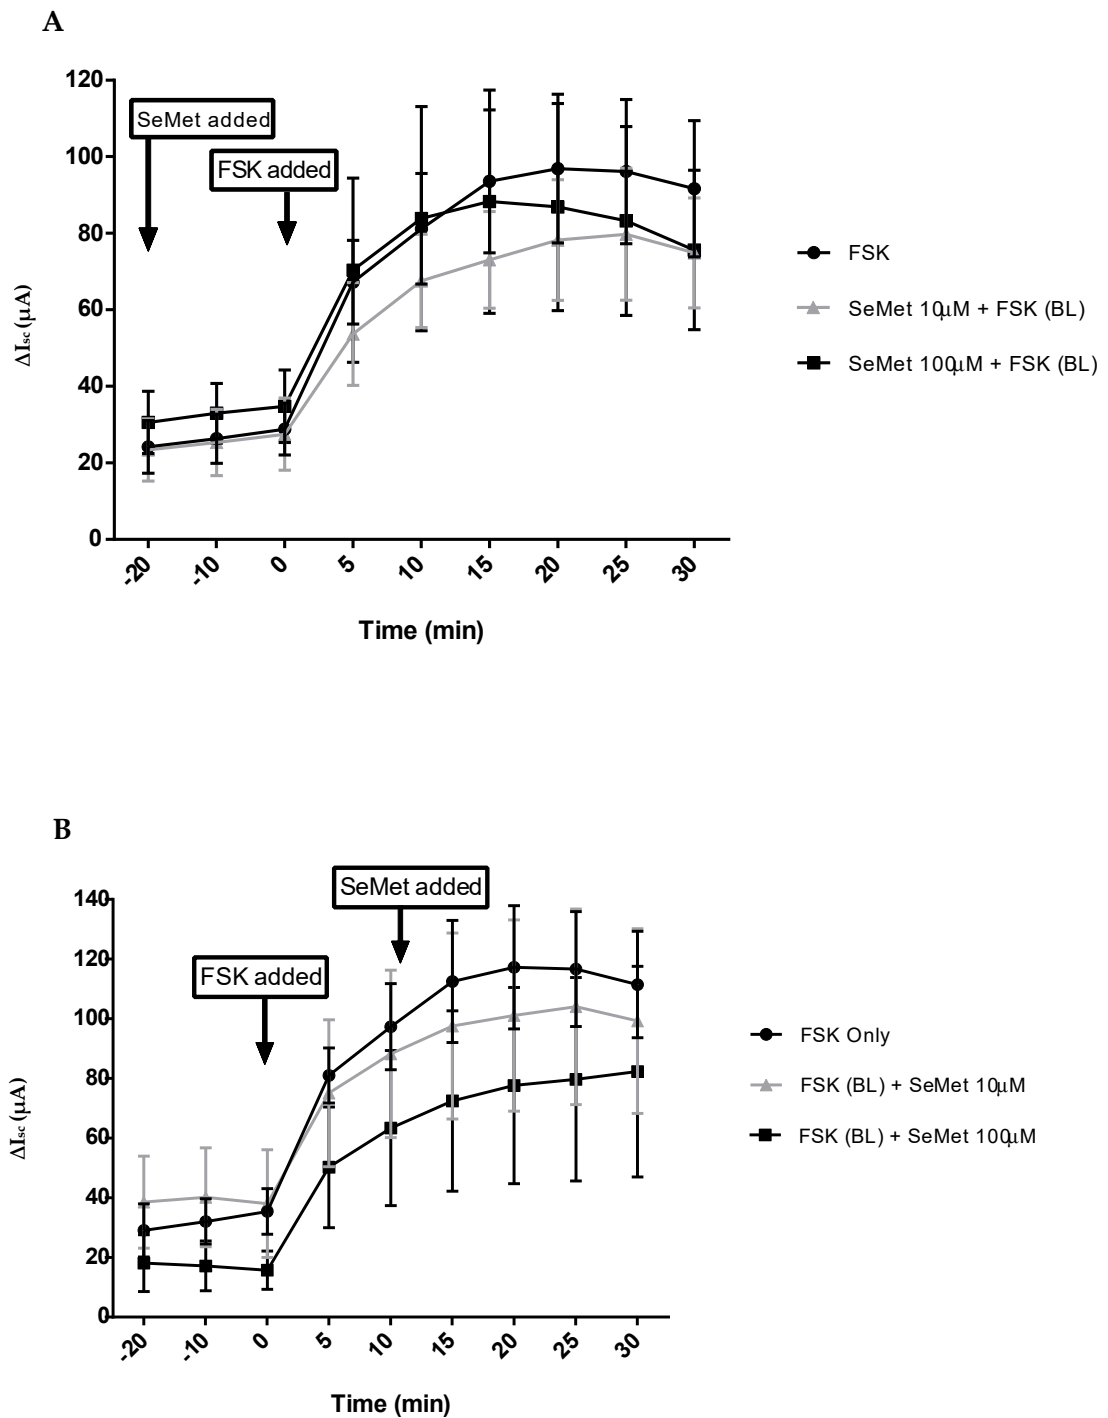

**Figure S2.** The effect of SeMet at 10 $\mu$ M and 100 $\mu$ M (AP&BL) on FSK-mediated Cl<sup>-</sup> secretion in rat colonic mucosae with A) SeMet pre-incubated before FSK addition in colonic mucosae; B) SeMet addition on plateau of FSK induced peak in colonic mucosae (n=6). 2-Way ANOVA with Bonferroni's post-test, no significance between treatments.

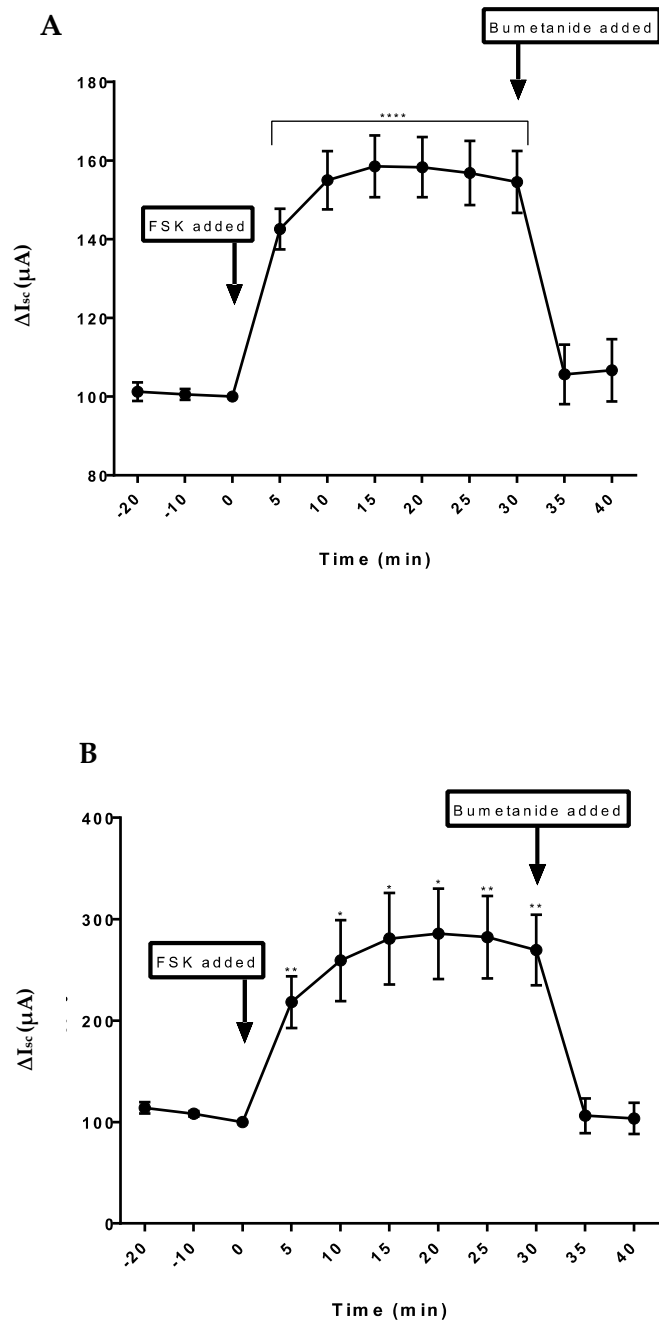

**Figure S3.** Bumetanide response to FSK stimulated  $Cl^-$  secretion in A) jejunal and B) colonic mucosae measured by change in  $I_{sc}$  compared to  $T=0$  min. One-way ANOVA with Bonferroni's post-test multiple comparison; \*  $P < 0.05$ , \*\*  $P < 0.01$ , and \*\*\* $P < 0.001$ , \*\*\*\* $P < 0.0001$  ( $N=16$ ).
